# Supplementary material for: Sequential activation of E2F via Rb degradation and c-Myc drives resistance to CDK4/6 inhibitors in breast cancer
Source: PubMed Central journal article supplement — Cell Rep. Author manuscript; Available in PMC 2023 Dec 31. (PMC10757862; doi:10.1016/j.celrep.2023.113198), 2023-10-21
Supplement: NIHMS1948168-supplement-1.pdf [file NIHMS1948168-supplement-1.pdf]

**Cell Reports, Volume 42**

**Supplemental information**

**Sequential activation of E2F via Rb degradation  
and c-Myc drives resistance  
to CDK4/6 inhibitors in breast cancer**

**Sungsoo Kim, Jessica Armand, Anton Safonov, Mimi Zhang, Rajesh K. Soni, Gary Schwartz, Julia E. McGuinness, Hanina Hibshoosh, Pedram Razavi, Minah Kim, Sarat Chandarlapaty, and Hee Won Yang**

## SUPPLEMENTARY ITEMS

**Figure S1:** Subsets of breast cancer cells expressing intact Rb adapt to CDK4/6i following initial response. Related to Figure 1.

**Figure S2:** Subsets of breast cancer cells adapt to CDK4/6i regardless of Rb expression levels. Related to Figure 1.

**Figure S3:** Expression levels of Rb protein are reduced in CDK4/6i-resistant cells relative to drug-naïve cells. Related to Figure 2.

**Figure S4:** Targeting proteasome activity prevents Rb-protein reduction mediated by CDK4/6i treatment. Related to Figure 3.

**Figure S5:** Treatment with proteasome inhibitors restores Rb-protein levels and suppress the growth of CDK4/6i-resistant cells. Related to Figure 3.

**Figure S6:** CDK4/6i treatment increases heterogeneity in E2F and CDK2 activation kinetics. Related to Figure 4.

**Figure S7:** Breast cancer cells entering quiescence reduce Rb-protein levels in both persister and non-persister cells. Related to Figure 5.

**Figure S8:** Rb knockout alone is sufficient to induce CDK4/6i adaptation. Related to Figure 6.

**Figure S9:** Targeting mitogenic or endocrine signaling inhibits c-Myc, global transcription rate, and CDK4/6i resistance. Related to Figure 6.

**Figure S10:** c-Myc amplifies E2F activity to facilitate the development of CDK4/6i-tolerant persisters following Rb-protein reduction. Related to Figure 7.

**Figure S11:** Lack of correlation between Rb levels and PFS in pre-treatment FFPE tumor samples. Related to Figure 7.

**Table S1:** Primers for Real-Time PCR. Related to STAR Methods.

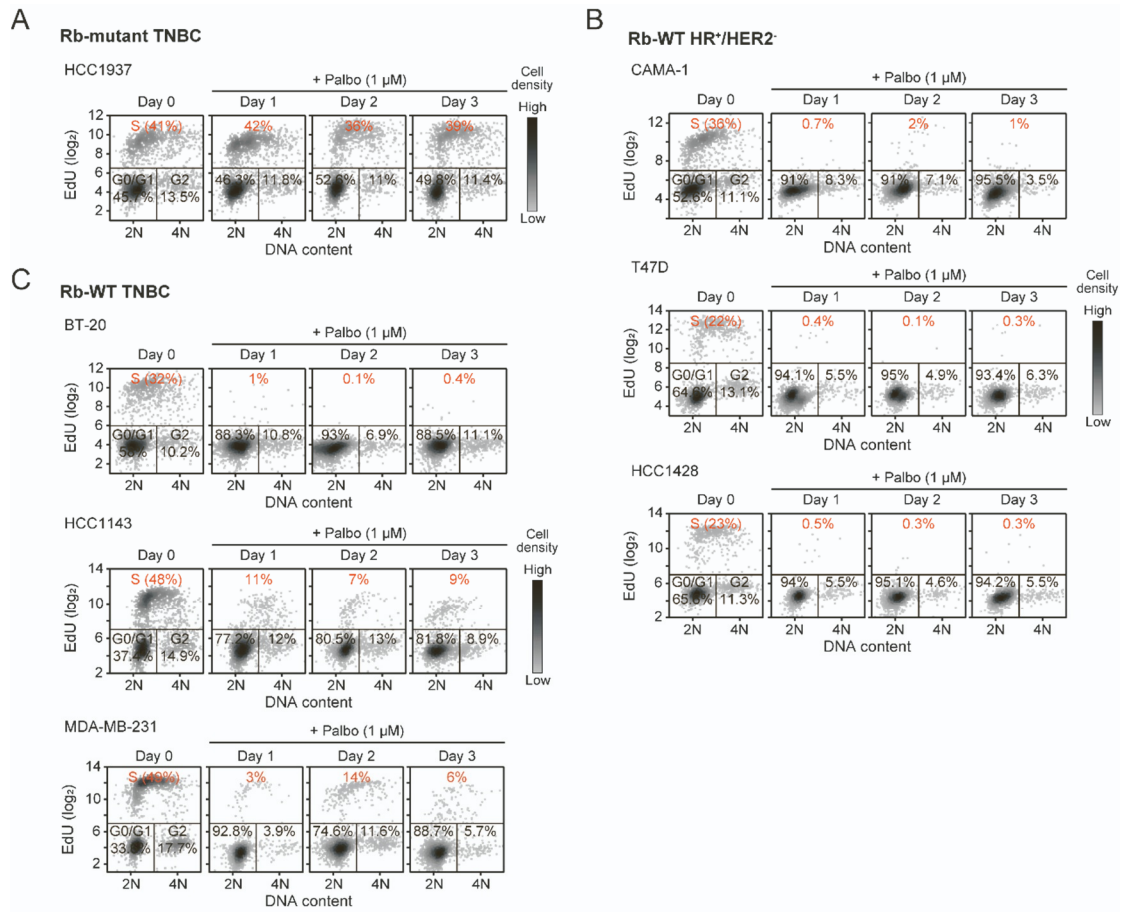

**Figure S1. Subsets of breast cancer cells expressing intact Rb adapt to CDK4/6i following initial response. Related to Figure 1.**

(A–C) Density scatterplots of Hoechst and EdU staining in *Rb*-mutant TNBC (A) and *Rb*-WT HR<sup>+</sup>/HER2<sup>-</sup> breast cancer (B) and TNBC (C) cells treated with palbociclib (1  $\mu$ M) for the indicated durations ( $n = 2,000$  cells/condition).

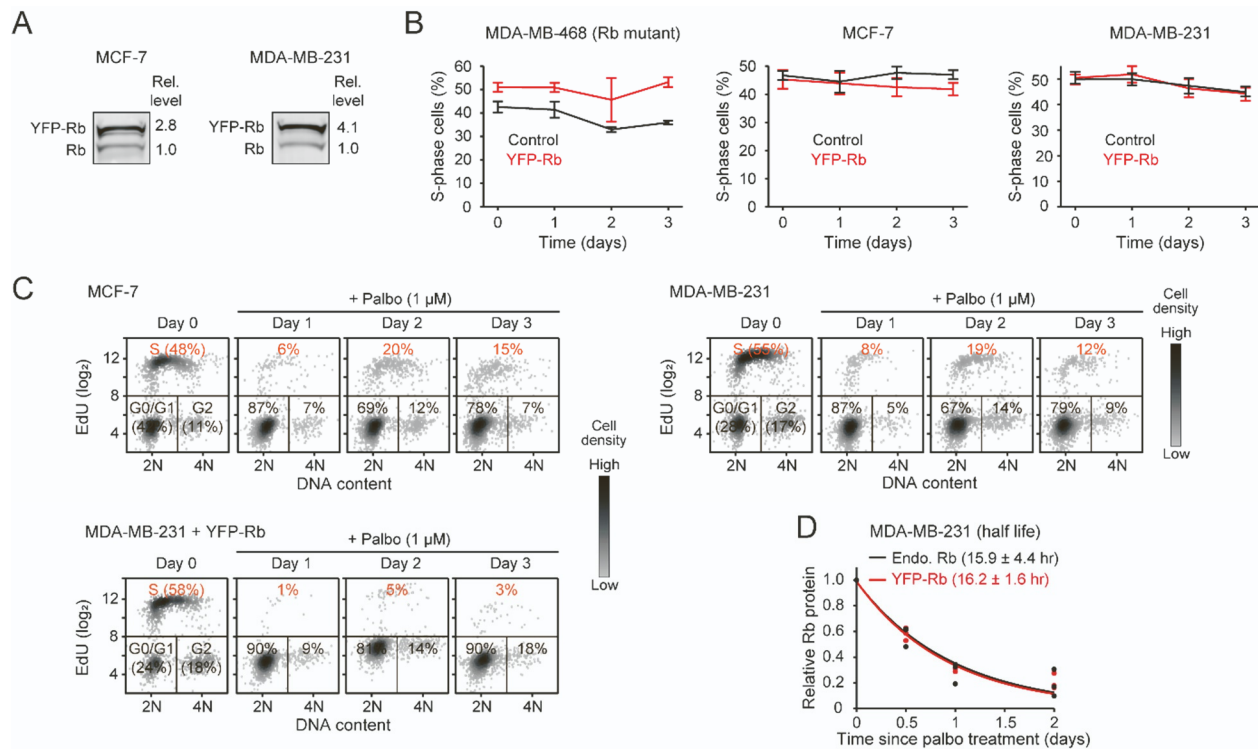

**Figure S2. Subsets of breast cancer cells adapt to CDK4/6i regardless of Rb expression levels. Related to Figure 1.**

(A) Immunoblot showing endogenous Rb and exogenous YFP-Rb protein expression in MCF-7 and MDA-MB-231 cells. Numbers represent relative YFP-Rb levels normalized to endogenous Rb levels.

(B) Percentage of S-phase cells in *Rb*-mutant MDA-MB-468, MCF-7, and MDA-MB-231 cells with or without YFP-Rb overexpression. Data are shown as means  $\pm$  SD ( $n = 3$  biological replicates).

(C) Density scatterplots of Hoechst and EdU in MCF-7 without YFP-Rb expression and MDA-MB-231 cells without or with YFP-Rb expression. Cells were treated with palbociclib (1  $\mu$ M) for the indicated durations ( $n = 2,000$  cells/condition).

(D) Relative levels of endogenous and exogenous Rb protein in MDA-MB-231 cells treated with palbociclib (1  $\mu$ M) for the indicate durations (0–2 days). Solid lines indicate best fitted lines. The half-life of Rb protein are indicated. Data are shown as means  $\pm$  SD ( $n = 3$  biological replicates).

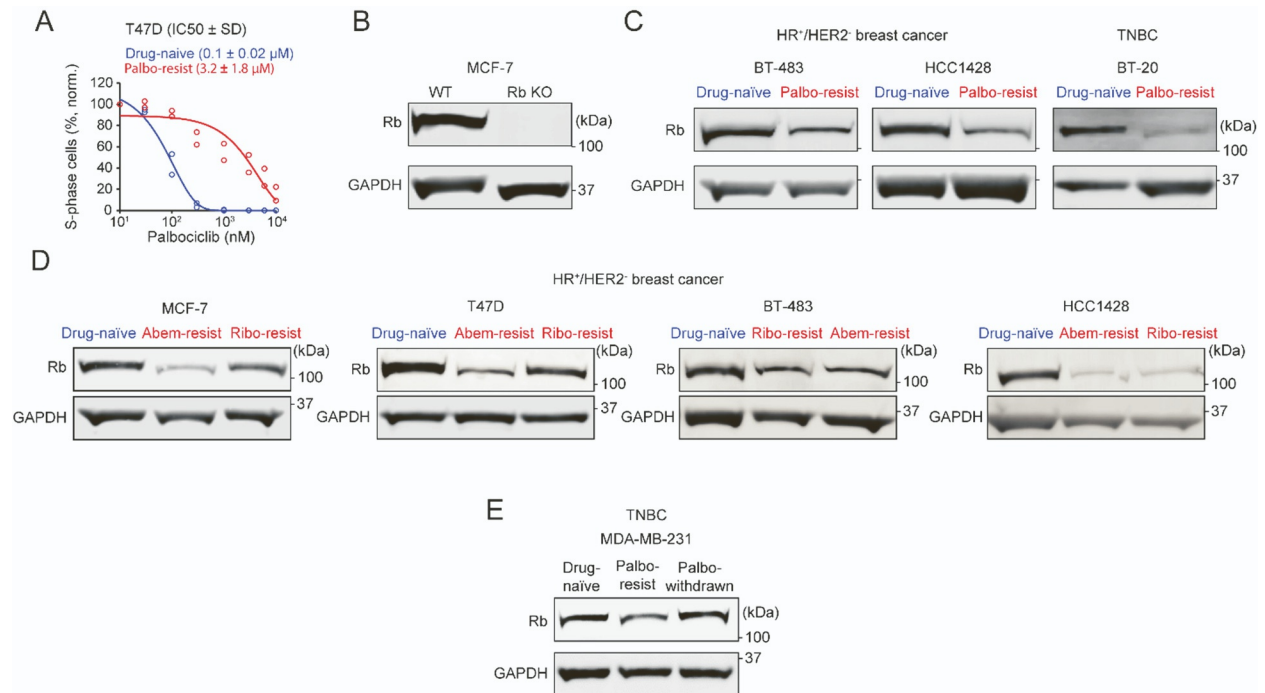

**Figure S3. Expression levels of Rb protein are reduced in CDK4/6i-resistant cells relative to drug-naïve cells. Related to Figure 2.**

(A) Dose-response curves for palbociclib treatment (48 hr) in drug-naïve and palbociclib-resistant T47D cells. IC50 values are shown as means ± SD ( $n = 2$  biological replicates).

(B) Immunoblot showing Rb and GAPDH expression in wild-type and Rb-knockout MCF-7 cells.

(C) Immunoblot showing Rb, and GAPDH expression in drug-naïve and palbociclib-resistant BT-483, HCC1428, and BT-20 cells.

(D) Immunoblot showing Rb and GAPDH expression in drug-naïve, ribociclib (1 μM)-resistant, abemaciclib (1 μM)-resistant MCF-7, T47D, BT-483, and HCC1428 cells.

(E) Immunoblot showing Rb and GAPDH expression in drug-naïve, palbociclib-resistant MDA-MB-231 cells with continued palbociclib (1 μM) treatment and after withdrawal for over 1 week.

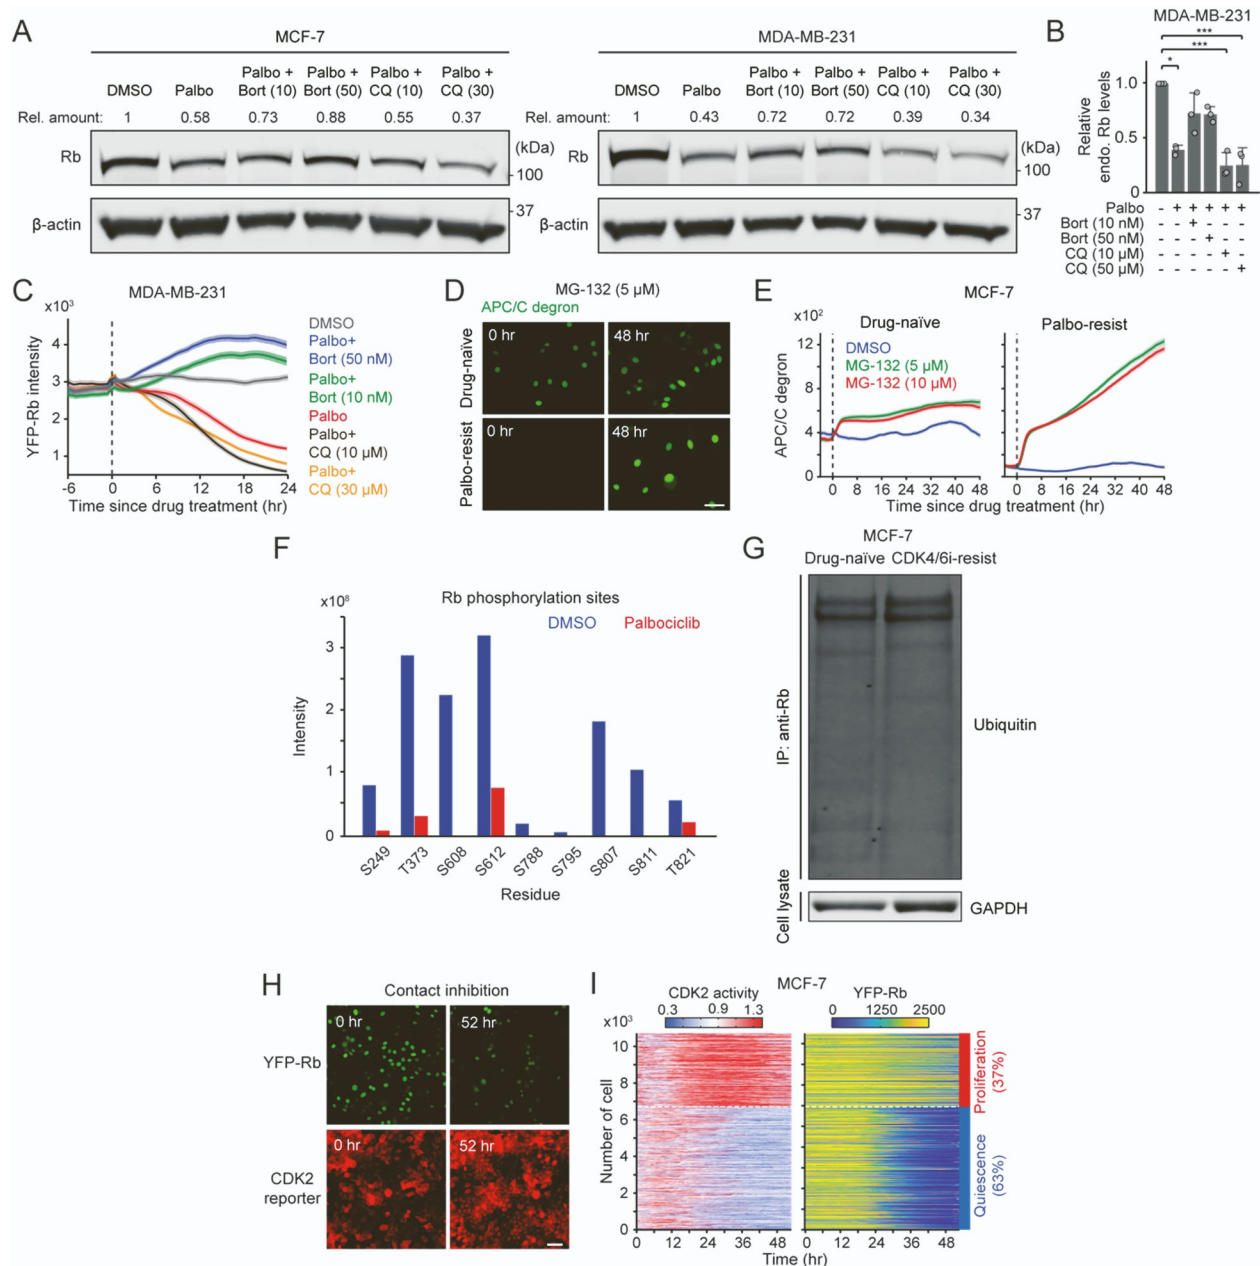

**Figure S4. Targeting proteasome activity prevents Rb-protein reduction mediated by CDK4/6i treatment. Related to Figure 3.**

(A) Immunoblot showing Rb and GAPDH expression in drug-naïve MCF-7 and MDA-MB-231 cells treated with combinations of palbociclib (1 μM), bortezomib (10 or 50 nM), and chloroquine (10 or 30 μM) for 24 hr.

(B) Relative endogenous Rb levels in MDA-MB-231 cells after treating with indicated drugs. Data are means ± SD ( $n = 3$  biological replicates).  $P$  values were calculated by one-way ANOVA (\*  $p \leq 0.05$ ; \*\*\*  $p \leq 0.0001$ ).

(C) Average traces of YFP-Rb intensities in MDA-MB-231 cells. Data are shown as means ± 95% CI (DMSO,  $n = 1,069$  cells; palbo,  $n = 1,365$  cells; palbo + bort (10),  $n = 1,421$  cells; palbo + bort (50),  $n = 1,622$  cells; palbo + CQ (10),  $n = 961$  cells; palbo + CQ (30),  $n = 1,696$  cells).

**(D)** Representative images of APC/C degron in drug-naïve and palbociclib-resistant MCF-7 cells before and after 48 hr treatment with MG-132 (5  $\mu$ M). Scale bar is 100  $\mu$ m.

**(E)** Averaged traces of APC/C degron levels in drug-naïve and palbociclib-resistant MCF-7 cells after DMSO and MG-132 (5  $\mu$ M or 10  $\mu$ M) treatment. Data are means  $\pm$  95% CI (DMSO,  $n$  = 8,814 cells; 5  $\mu$ M MG-132,  $n$  = 4,425 cells; 10  $\mu$ M MG-132,  $n$  = 6,357 cells).

**(F)** Changes in Rb phosphorylation sites detected by mass-spectrometry analysis after treatment with DMSO or palbociclib (1  $\mu$ M) + bortezomib (50 nM) for 24 hr.

**(G)** Immunoblot showing ubiquitination after immunoprecipitation of Rb in drug-naïve and palbociclib-resistant MCF-7 cells. Cells were treated MG-132 (5  $\mu$ M) for 1 hr before collecting lysates.

**(H)** Representative images of YFP-Rb and CDK2 reporter before and after contact inhibition. Scale bar is 100  $\mu$ m.

**(I)** Heatmaps of single-cell traces for CDK2 activity and YFP-Rb intensity in MCF-7 cells. Each row represents a single-cell trace. Percentages indicate the proportion of proliferation (CDK2 activity > 1.0 for over 2 hr) and quiescence (no CDK2 activation) cells, based on CDK2 activity 36–52 hr post-treatment.

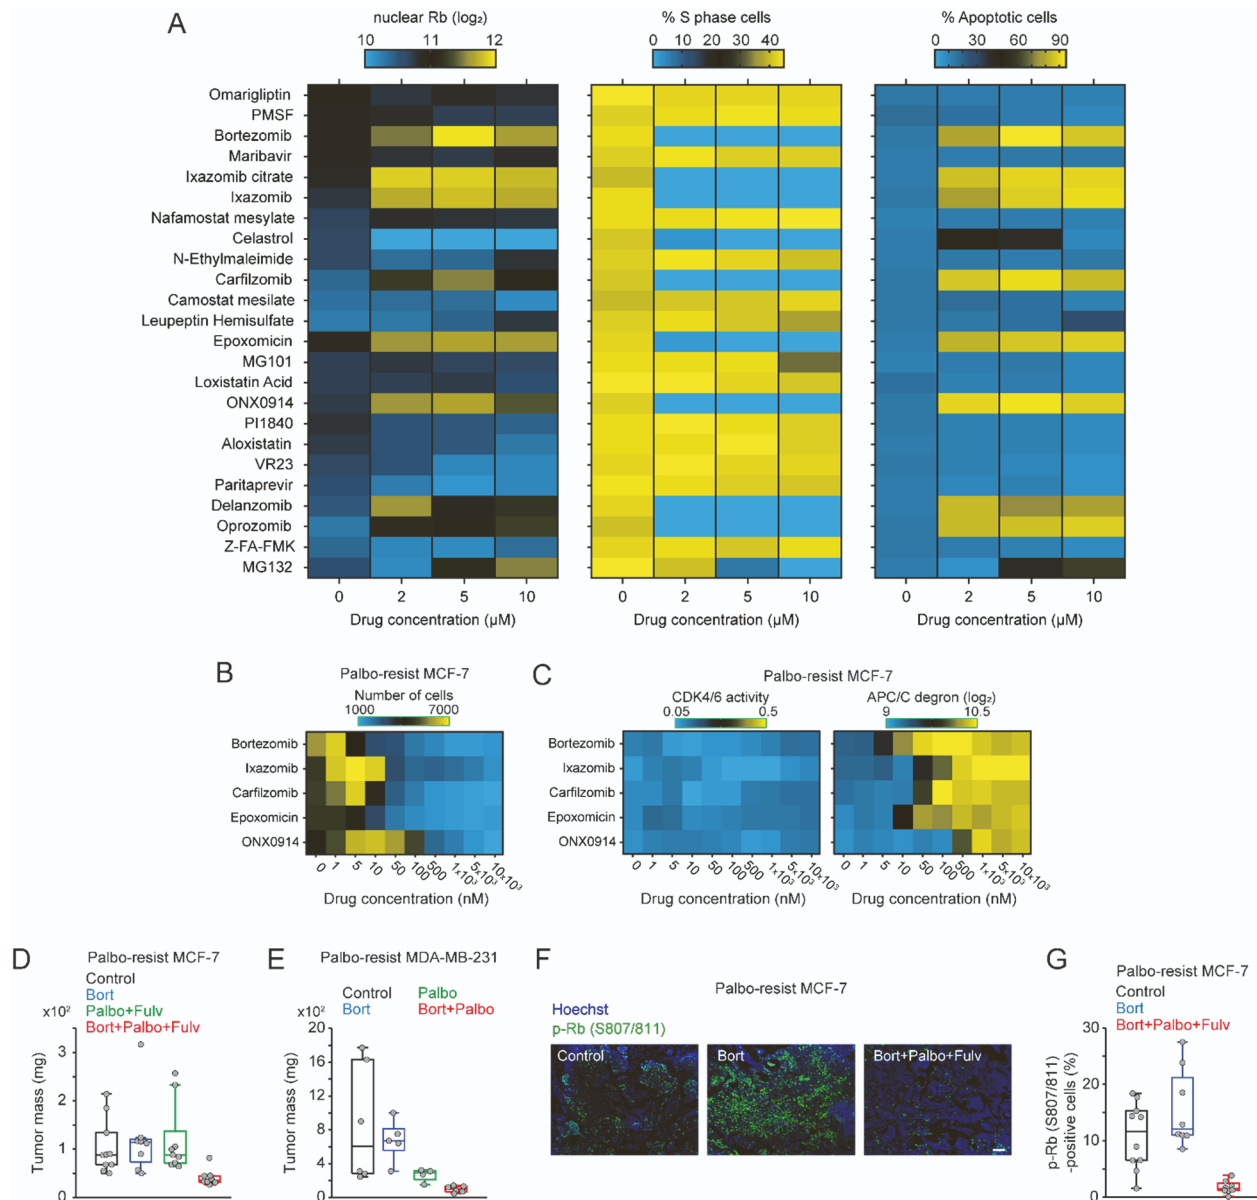

**Figure S5. Treatment with proteasome inhibitors restores Rb-protein levels and suppresses the growth of CDK4/6-resistant cells. Related to Figure 3.**

(A) Heatmaps of nuclear Rb levels, percentage of S-phase, and apoptotic cells according to the color map. Palbociclib-resistant MCF-7 cells were treated with indicated proteasome inhibitors (0, 2, 5, and 10 μM) in the presence of palbociclib (1 μM) for 48 hr ( $n > 1,000$  cells/condition).

(B and C) Heatmap of the number of cells (B), endogenous CDK4/6 activity, and APC/C degron intensity (C) according to the color map. Palbociclib-resistant MCF-7 cells were treated with indicated proteasome inhibitors (0–10 μM) in the presence of palbociclib (1 μM) for 48 hr ( $n > 1,000$  cells/condition).

(D and E) Box plot of tumor mass in MCF-7 (D) and MDA-MB-231 (E) xenografts. Middle lines indicate the median, boxes represent the 25<sup>th</sup> and 75<sup>th</sup> percentiles, and lines denote the total range for each population (D: control,  $n = 10$  mice; bort,  $n = 8$  mice; palbo + fulv,  $n = 9$  mice; bort +



palbo + fulv,  $n = 8$  mice; E: control,  $n = 6$  mice; bort,  $n = 5$  mice; palbo,  $n = 4$  mice; bort + palbo,  $n = 6$  mice).

(F) Representative images of Hoechst and phosphorylated Rb (p-Rb) at S807/811 staining in tumor tissues. Scale bar is 100  $\mu\text{m}$ .

(G) Box plot of the percentage of p-Rb-positive cells (control,  $n = 10$  mice; bort,  $n = 8$  mice; bort + palbo + fulv,  $n = 8$  mice).

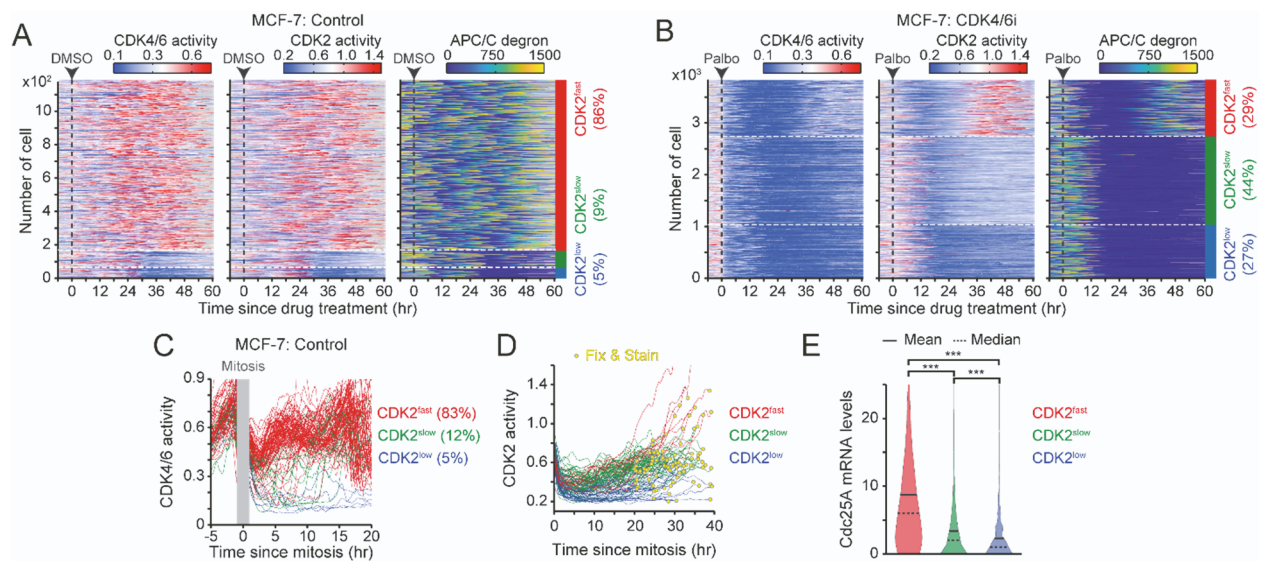

**Figure S6. CDK4/6i treatment increases heterogeneity in E2F and CDK2 activation kinetics. Related to Figure 4.**

(A and B) Heatmaps of single-cell traces for CDK4/6 and CDK2 activities and APC/C degron intensity in MCF-7 cells treated with either DMSO (A) or palbociclib (1  $\mu$ M) (B). Each row represents a single-cell trace. Percentages indicate the proportion of CDK2<sup>fast</sup> (CDK2 activity > 1.0 for over 2 hr), CDK2<sup>slow</sup> (CDK2 activity > 0.6 for over 2 hr), and CDK2<sup>low</sup> (no CDK2 activation) cells, based on CDK2 activity 30–60 hr post-treatment. Arrow and black dotted line mark the drug-treatment time.

(C) Single-cell traces for CDK4/6 activity aligned by mitosis in MCF-7 cells treated with DMSO. (D) Single-cell traces for CDK2 activity aligned to the time after mitosis. MCF-7 cells were treated with palbociclib (1  $\mu$ M) and classified based on CDK2 activity as described in (A and B). Yellow points correspond to the time of fixation.

(E) Cdc25A mRNA level in MCF-7 cells classified based on CDK2 activation kinetics after palbociclib (1  $\mu$ M) treatment (CDK2<sup>fast</sup>,  $n = 1,098$  cells; CDK2<sup>slow</sup>,  $n = 5,584$  cells; CDK2<sup>low</sup>,  $n = 2,566$  cells).  $P$  values were calculated by one-way ANOVA (\*\*\*)  $p \leq 0.0001$ .

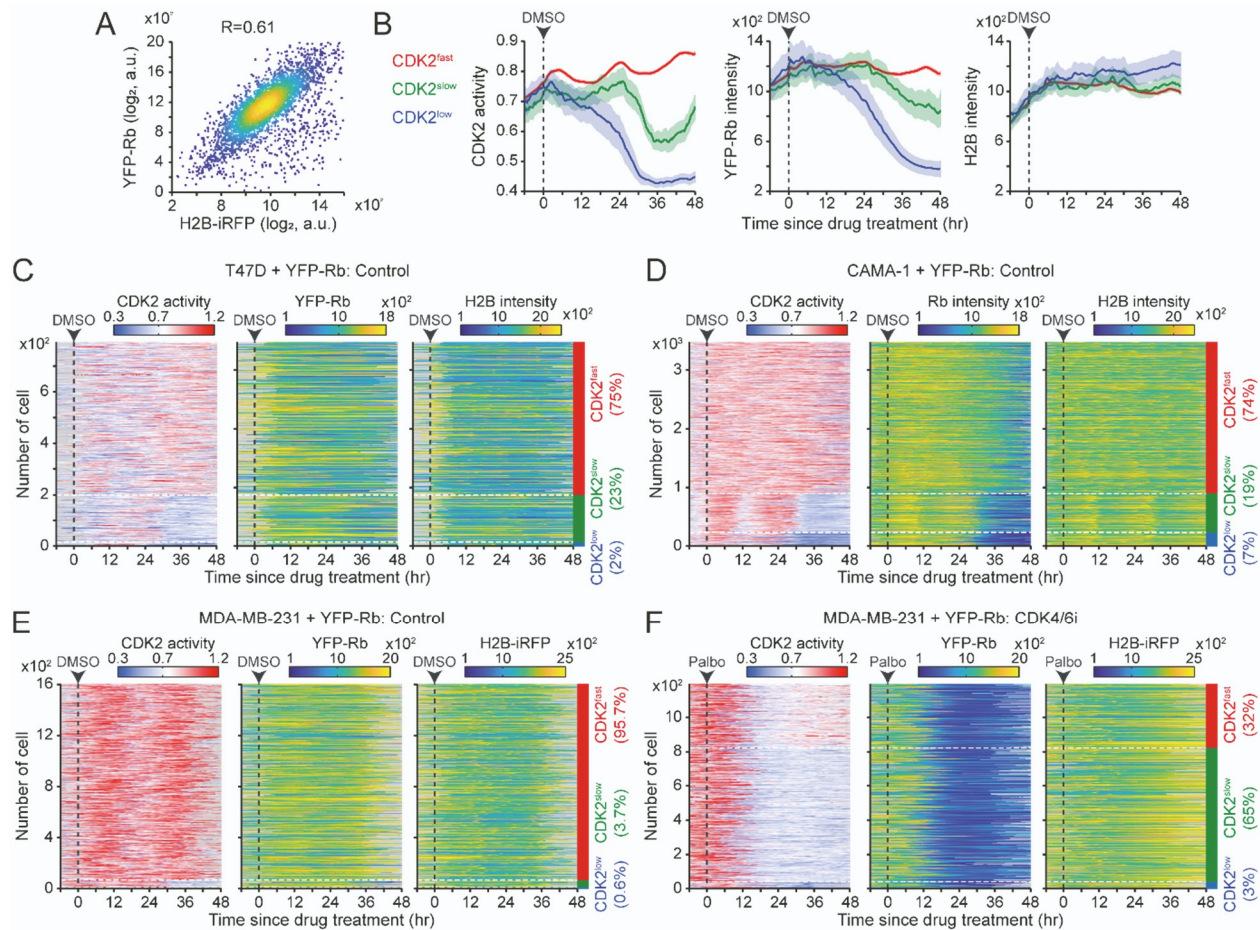

**Figure S7. Breast cancer cells entering quiescence reduce Rb-protein levels in both persister and non-persister cells. Related to Figure 5.**

(A) Density scatterplot of YFP-Rb versus H2B-iRFP intensity in Rb-knockout MCF-7 cells expressing the YFP-Rb-p2a-H2B-iRFP construct. The correlation value ( $R$ ) between YFP-Rb and H2B-iRFP intensities is indicated.

(B) Average traces of CDK2 activity and YFP-Rb and H2B-iRFP intensities in Rb-knockout MCF-7 cells expressing YFP-Rb treated with DMSO ( $CDK2^{fast}$ ,  $n = 4,314$  cells;  $CDK2^{slow}$ ,  $n = 68$  cells;  $CDK2^{low}$ ,  $n = 64$ ).

(C–F) Heatmaps of single-cell traces for CDK2 activity and YFP-Rb and H2B-iRFP intensities in T47D (C) and CAMA-1 (D) cells treated with DMSO and MDA-MB-231 cells treated with DMSO (E) or palbociclib (1  $\mu$ M) (F). Each row represents a single-cell trace. The percentages denote the proportion of  $CDK2^{fast}$  (CDK2 activity > 0.8 for over 2 hr),  $CDK2^{slow}$  (CDK2 activity > 0.6 for over 2 hr), and  $CDK2^{low}$  (no CDK2 activation) cells, classified based on CDK2 activity 30–48 hr post-treatment. Arrow and black dotted line mark the drug-treatment time.

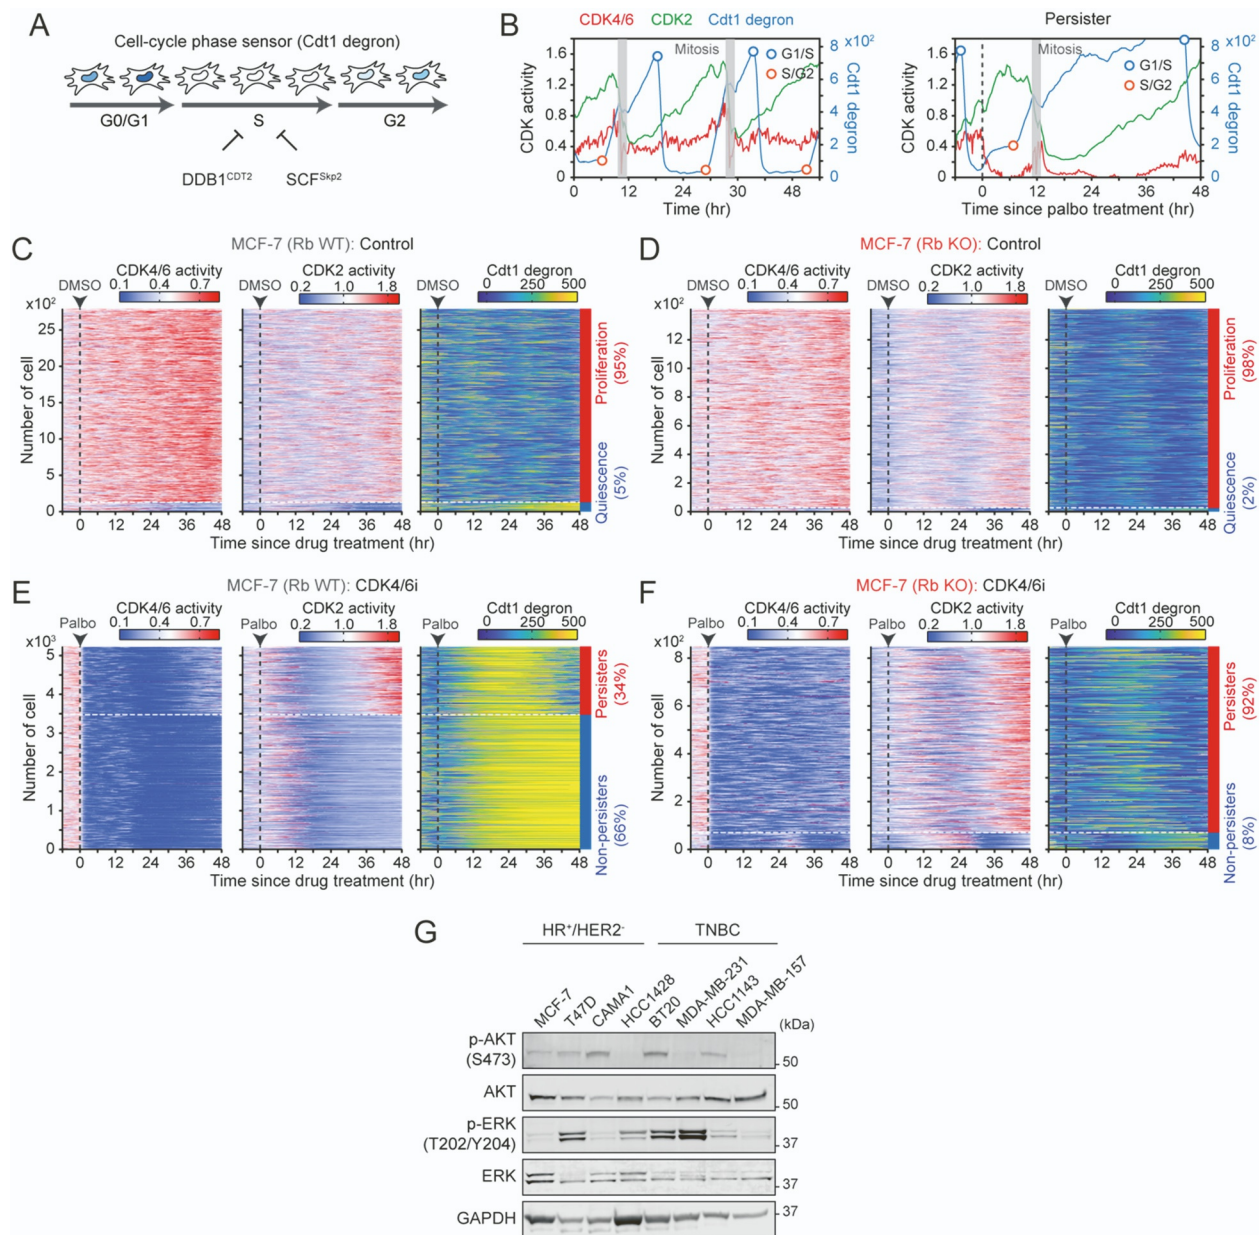

**Figure S8. Rb knockout alone is sufficient to induce CDK4/6i adaptation. Related to Figure 6.**

(A) Schematic diagram depicting the cell cycle phase sensor is based on a Cdt1 degron (a.a 1–100). During S-phase, Cdt1 degron is degraded by two E3 complexes, Cul4-Ddb1<sup>Cdt2</sup> and Scf<sup>Skp2</sup>. (B) Single cell traces of CDK4/6 and CDK2 activities and Cdt1 degron intensity in MCF-7 cells. G1/S (blue dot) and S/G2 (orange dot) transitions were labeled. Right: A cell was treated with palbociclib (1 $\mu$ M) and identified as a persister based on CDK2 activity. (C–F) Heatmaps of single-cell traces for CDK4/6 and CDK2 activities and Cdt1 degron intensity in wild-type (C, E) and Rb-knockout (D, F) MCF-7 cells treated with either DMSO (C, D) or palbociclib (1  $\mu$ M) alone (E, F). Each row represents a single-cell trace. The percentages mark the proportion of proliferation or persisters (CDK2 activity >1.0 for more than 2 hr) and quiescence

or non-persisters (no CDK2 activation) cells classified based on CDK2 activity during 30–48 hr after drug treatment. Arrow and black dotted line mark the drug-treatment time.

**(G)** Immunoblot showing expression of p-AKT (S473), AKT, p-ERK (T202/Y204), ERK, and GAPDH in a panel of breast cancer cell lines.

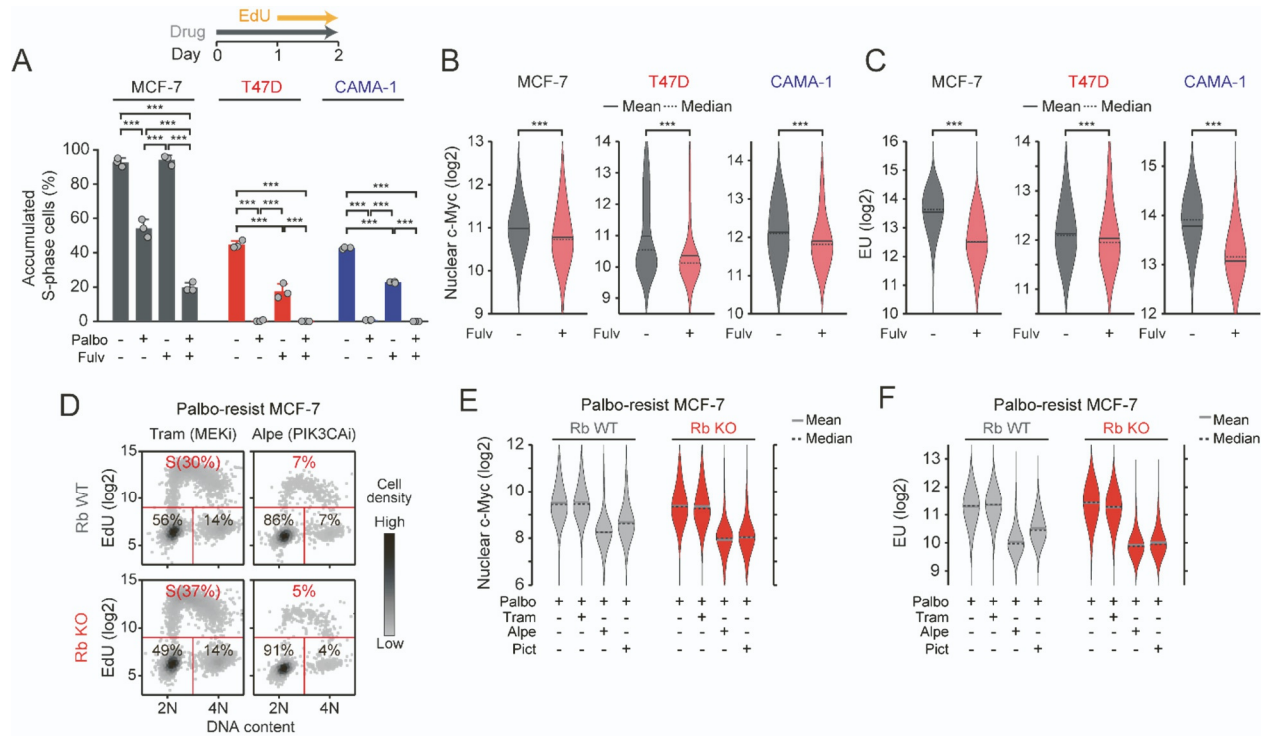

**Figure S9. Targeting mitogenic or endocrine signaling inhibits c-Myc, global transcription rate, and CDK4/6i resistance. Related to Figure 6.**

(A) Percentage of S-phase cells. Cells were treated with DMSO or combinations of palbociclib (1  $\mu$ M) and fulvestrant (500 nM) for 2 days. Data are shown as means  $\pm$  SD ( $n = 3$  biological replicates).  $P$  values were calculated by one-way ANOVA (\*\*\*)  $p \leq 0.0001$ .

(B and C) Violin plots of c-Myc (B) and EU (C) levels in cells treated with fulvestrant (500 nM) for 2 days.  $P$  values were calculated by two-tailed paired  $t$ -test (\*\*\*)  $p \leq 0.0001$ .

(D) Density scatterplot of Hoechst and EdU staining. Wild-type and Rb-knockout MCF-7 cells resistant to palbociclib (1  $\mu$ M) were treated with trametinib (tram, 100 nM) and alpelisib (alpe, 1  $\mu$ M) for 2 days ( $n = 5,000$  cells/condition).

(E and F) Representative violin plots of c-Myc (E) and EU (F) levels in wild-type and Rb-knockout palbociclib-resistant MCF-7 cells treated with DMSO, trametinib (100 nM), alpelisib (1  $\mu$ M), and pictilisib (250 nM) for 2 days ( $n = 5,000$  cells/condition).

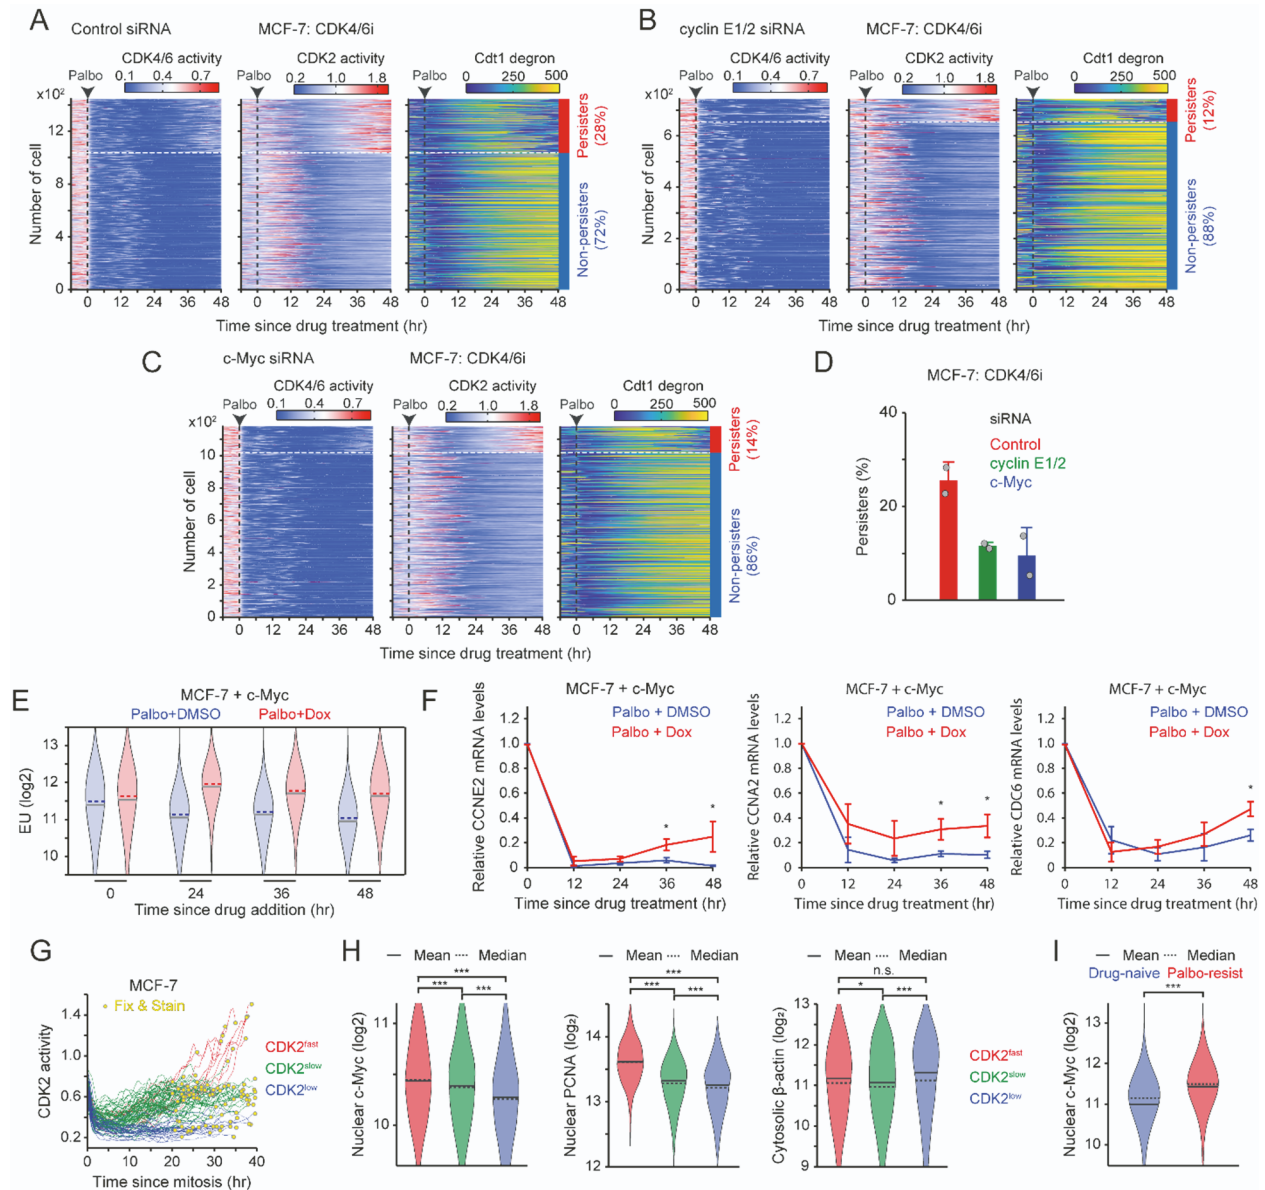

**Figure S10. c-Myc amplifies E2F activity to facilitate the development of CDK4/6i-tolerant persisters following Rb-protein reduction. Related to Figure 7.**

(A–C) Heatmaps of single-cell traces for CDK4/6 and CDK2 activities and Cdt1 degron intensity. Each row represents a single-cell trace. MCF-7 cells transfected with control (A), cyclin E1/2 (B), or c-Myc (C) siRNAs 24 hr before live-cell imaging. The percentages mark the proportion of persisters (CDK2 activity >1.0 for more than 2 hr) and non-persisters (no CDK2 activation) cells classified based on CDK2 activity during 30–48 hr after drug treatment. Arrow and black dotted line mark the drug-treatment time.

(D) Percentage of persisters after palbociclib (1 μM) treatment in MCF-7 cells transfected with control, cyclin E1/2, or c-Myc siRNA. Data are means ± SD ( $n = 2$  biological replicates).

(E) Violin plot represent EU levels at indicated times after treatment with palbociclib (1 μM) plus either DMSO or doxycycline (5 μM) in MCF-7 cells expressing inducible c-Myc ( $n > 5,000$  cells/condition).

(F) Relative mRNA expression of E2F target genes, CCNE2, CCNA2, and CDC6, in MCF-7 cells expressing an inducible c-Myc construct. Cells were treated with palbociclib (1  $\mu$ M) plus either DMSO or doxycycline (5  $\mu$ M) for indicated time. Data are shown as means  $\pm$  SD ( $n = 3$  biological replicates).  $P$  values were calculated using two-tailed paired  $t$ -test (\*  $p \leq 0.05$ ).

(G) Single-cell traces for CDK2 activity aligned to the time after mitosis. MCF-7 cells were treated with palbociclib (1  $\mu$ M) and classified based on CDK2 activity 30–48 hr post-treatment: CDK2<sup>fast</sup> (CDK2 activity  $>1.0$  for over 2 hr), CDK2<sup>slow</sup> (CDK2 activity  $>0.6$  for over 2 hr), and CDK2<sup>low</sup> (no CDK2 activation) cells. Yellow points correspond to the time of fixation.

(H) Violin plots of c-Myc levels, PCNA, and  $\beta$ -actin in MCF-7 cells classified based on CDK2 activation kinetics after palbociclib (1  $\mu$ M) treatment (c-Myc: CDK2<sup>fast</sup>,  $n = 896$  cells; CDK2<sup>slow</sup>,  $n = 5,510$  cells; CDK2<sup>low</sup>,  $n = 2,635$  cells; PCNA: CDK2<sup>fast</sup>,  $n = 1,106$  cells; CDK2<sup>slow</sup>,  $n = 5,634$  cells; CDK2<sup>low</sup>,  $n = 2,592$  cells;  $\beta$ -actin: CDK2<sup>fast</sup>,  $n = 896$  cells; CDK2<sup>slow</sup>,  $n = 5,513$  cells; CDK2<sup>low</sup>,  $n = 2,639$  cells).  $P$  values were calculated by one-way ANOVA (\*  $p \leq 0.05$ , \*\*\*  $p \leq 0.0001$ ).

(I) Violin plots of c-Myc levels in drug-naïve and palbociclib-resistant cells ( $n = 4,000$  cells/condition).  $P$  values were calculated using two-tailed paired  $t$ -test (\*\*\*  $p \leq 0.0001$ ).



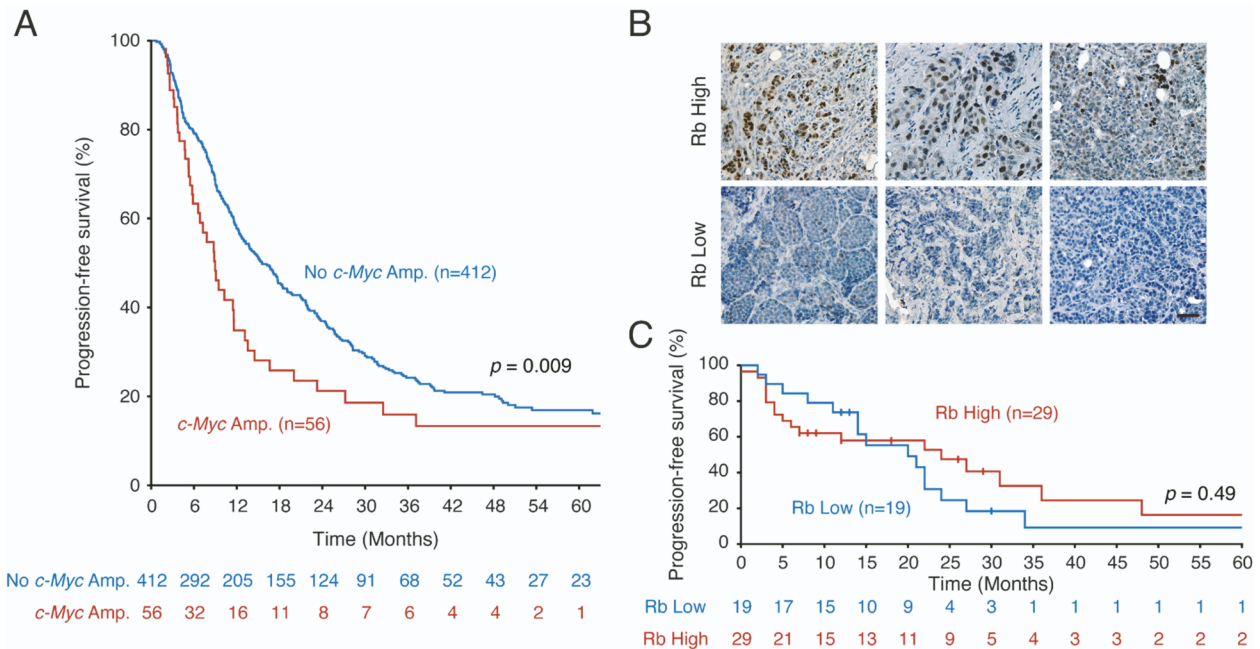

**Figure S11. Lack of correlation between Rb levels and PFS in pre-treatment FFPE tumor samples. Related to Figure 7.**

(A) Kaplan-Meier plots of PFS based on *c-Myc* genetic amplification status, with adjustment for endocrine therapy partner. The  $p$  value was calculated by the log-rank test.

(B) Representative images of pre-treatment tissue samples exhibiting high Rb expression (H-score > 140) or low Rb expression (H-score  $\leq$  140). Scale bar is 50  $\mu$ m.

(C) Kaplan-Meier plots of PFS in relation to high or low Rb expression levels. The  $p$  value was calculated by the log-rank testing.

**Table S1. Primers for Real-Time PCR. Related to STAR Methods.**

| Gene          | Sequence 5' → 3'                                        |
|---------------|---------------------------------------------------------|
| <i>RB1</i>    | F: CTCTCGTCAGGCTTGAGTTTG<br>R: GACATCTCATCTAGGTCAACTGC  |
| <i>E2F1</i>   | F: TCTCGGCCAGGTACTGATG<br>R: ACCCTGACCTGCTGCTCTT        |
| <i>MCM2</i>   | F: CCGTGACCTTCCACCATTTGA<br>R: GGTAGTCCCTTCCATGCCAT     |
| <i>PCNA</i>   | F: CCTGCTGGGATATTAGCTCCA<br>R: CAGCGGTAGGTGTCGAAGC      |
| <i>CCNE2</i>  | F: TCAAGACGAAGTAGCCGTTTAC<br>R: TGACATCCTGGGTAGTTTTCTC  |
| <i>CCNA2</i>  | F: TGGAAAGCAAACAGTAAACAGCC<br>R: GGGCATCTTCACGCTCTATTT  |
| <i>RSP23</i>  | F: TTCTTGATCAGCTGGACCCT<br>R: ACCCTTTTGGAGGTGCTTCT      |
| <i>Ki67</i>   | F: ACGCCTGGTTACTATCAAAAGG<br>R: CAGACCCATTTACTTGTGTTGGA |
| <i>CDC6</i>   | F: GCCGAACTAGAACAGCATCTT<br>R: GGGCTGGTCTAATTTTTCCTGC   |
| <i>mRb1</i>   | F: TCGATAACCAGTACCAAGGTTGA<br>R: ACACGTCCGTTCTAATTTGCTG |
| <i>mGAPDH</i> | F: AGGTCGGTGTGAACGGATTTG<br>R: GGGGTCGTTGATGGCAACA      |
